1 **Phylogeographic structure of the dunes sagebrush lizard, an endemic habitat**  
2 **specialist**

3

4 **Authors**

5 Lauren M. Chan, Department of Biology, Pacific University, Forest Grove, Oregon, USA\*

6 Charles W. Painter, Endangered Species Program, New Mexico Department of Game and  
7 Fish, Santa Fe, New Mexico, USA †

8 Michael T. Hill, Albuquerque, New Mexico, USA.

9 Toby J. Hibbitts Biodiversity Research and Teaching Collections, Department of Wildlife  
10 and Fisheries Sciences, and Natural Resources Institute, Texas A&M University, College  
11 Station, Texas, USA

12 Daniel J. Leavitt, Natural Resources Program, Naval Facilities Engineering Command South  
13 West, San Diego, California, USA

14 Wade A. Ryberg, Natural Resources Institute, Texas A&M University, College Station, Texas,  
15 USA

16 Danielle Walkup, Natural Resources Institute, Texas A&M University, College Station, Texas,  
17 USA

18 Lee A. Fitzgerald, Biodiversity Research and Teaching Collections, Department of Ecology  
19 and Conservation Biology, and EEB PhD Program, Texas A&M University, College  
20 Station, Texas, USA

21

22 \* Corresponding author: [lchan@pacificu.edu](mailto:lchan@pacificu.edu); +1 503-352-1469

23 † deceased

24

25 **Keywords:** *Sceloporus arenicolus*, fragmentation, conservation genetics, population

26 genetics, shinnery oak sand dunes, Mescalero Sands, Monahans Sandhills.

27

28 **Short Title:** Phylogeography of *Sceloporus arenicolus*

## 29 **Abstract**

30           Phylogeographic divergence and population genetic diversity within species reflect  
31 the impacts of habitat connectivity, demographics, and landscape level processes in both  
32 the recent and distant past. Characterizing patterns of differentiation across the geographic  
33 range of a species provides insight on the roles of organismal and environmental traits, on  
34 evolutionary divergence, and future population persistence. This is particularly true of  
35 habitat specialists where habitat availability and resource dependence may result in  
36 pronounced genetic structure as well as increased population vulnerability. We use DNA  
37 sequence data as well as microsatellite genotypes to estimate range-wide phylogeographic  
38 divergence, historical population connectivity, and historical demographics in an endemic  
39 habitat specialist, the dunes sagebrush lizard (*Sceloporus arenicolus*). This species is found  
40 exclusively in dune blowouts and patches of open sand within the shinnery oak-sand dune  
41 ecosystem of southeastern New Mexico and adjacent Texas. We find evidence of  
42 phylogeographic structure consistent with breaks and constrictions in suitable habitat at  
43 the range-wide scale. In addition, we find support for a dynamic and variable evolutionary  
44 history across the range of *S. arenicolus*. Populations in the Monahans Sandhills have  
45 deeply divergent lineages consistent with long-term demographic stability. In contrast,  
46 populations in the Mescalero Sands are not highly differentiated, though we do find  
47 evidence of demographic expansion in some regions and relative demographic stability in  
48 others. Phylogeographic history and population genetic differentiation in this species has  
49 been shaped by the configuration of habitat patches within a geologically complex and  
50 historically dynamic landscape. Our findings identify regions as genetically distinctive

51 conservation units as well as underscore the genetic and demographic history of different  
52 lineages of *S. arenicolus*.

53

## 54 **Introduction**

55       Patterns of population genetic diversity within species are shaped by both  
56 evolutionary and contemporary history (Rissler, 2016). Though anthropogenic changes to  
57 landscapes alter patterns of connectivity that can result in the divergence or coalescence of  
58 populations, these processes take place on a background of evolutionary history  
59 determined by chance, species' life history, and also geologic and climatic changes.  
60 Characterizing this evolutionary history, and identifying the role that organismal traits,  
61 evolutionary processes, and ecological conditions have on patterns of phylogeographic  
62 divergence adds to our understanding of evolution, and is also fundamental to conserving  
63 evolutionary potential in the face of anthropogenic disturbance and climate change  
64 (Olivieri et al., 2015).

65       The phylogeographic history of species can reflect the roles that habitat  
66 connectivity, gene flow, and population stability have played in a species' evolutionary  
67 persistence. Some species may be characterized by deeply divergent lineages, suggesting a  
68 history of limited dispersal and low connectivity among sites (e.g., Richmond et al., 2013,  
69 2014; Chan et al., 2013), especially in ecosystems with steep environmental gradients and  
70 discontinuous habitat (Vandergast et al., 2008). Plant and animal taxa in naturally  
71 fragmented landscapes, for example, can exhibit strong patterns of genetic population  
72 structure with selection favoring limited dispersal. Phylogeographic analyses of  
73 *Stenopelmatus* species (Jerusalem crickets) in southwestern North America, for example,

74 revealed limited dispersal among populations, and identified a recent response to  
75 anthropogenic change (Vandergast et al., 2007). A meta-analysis of genetic diversity among  
76 21 species of terrestrial animals identified hotspots of genetic diversity that may also be  
77 regions with high levels of trait divergence due to natural selection (Vandergast et al.,  
78 2008). Alternatively, populations may be only weakly divergent across a species' range  
79 indicating high connectivity (e.g. Lippé et al., 2006; Chan and Zamudio, 2009) even in the  
80 face of strong local dynamics (e.g. Pierson et al., 2013). Identifying evolutionary scenarios  
81 and processes that have resulted in particular phylogeographic patterns can help us  
82 disentangle processes that underlie population genetic divergence from those that  
83 maintain genetic diversity. Understanding the drivers of population genetic structure  
84 across the range of a species can also help us predict the response to loss of habitat and the  
85 overall vulnerability of species to anthropogenic landscape change.

86 Ecological specialists can have greater population genetic and phylogeographic  
87 structure than generalists because individuals and populations may be restricted to  
88 spatially isolated patches of suitable habitat. (Roderick et al., 2012; Schär et al., 2018; Wort  
89 et al., 2019). Ecological specialists may have narrow physiological tolerances, specific  
90 habitat requirements, and be locally abundant but rare at regional scales (Devictor et al.,  
91 2008). Habitat specialists use specific landscape features and vegetation associations  
92 within their range, and often possess eco-morphological and behavioral adaptations (Miles,  
93 1994a, 1994b). Traits that make habitat specialists well-suited for a narrow habitat niche  
94 also tend to make them relatively poor dispersers (Clobert et al., 2012). Low tolerance for  
95 unsuitable landscapes is expected to restrict movements among isolated patches of  
96 preferred habitat. Ecological studies focusing on the demography and distribution of

97 habitat specialists have found they are sensitive to landscape fragmentation (Leavitt and  
98 Fitzgerald, 2013; Walkup et al., 2017).

99         Local processes are often linked to patterns observed across long-term,  
100 evolutionary time scales and at broader spatial scales (see reviews by Cutter, 2013; Rissler,  
101 2016). Thus, in specialists with strict habitat specificity and limited dispersal among  
102 populations, we might expect phylogeographic structure to reflect historical patterns of  
103 divergence and low population connectivity overall (e.g., Roderick et al., 2012).

104 Alternatively, habitat specialists may have well-connected populations throughout their  
105 range, indicating a strong role for dispersal and migration that counters the divergence of  
106 potentially isolated local populations across longer time-scales (Pierson et al., 2013).

107 Characterizing evolutionary patterns of divergence and historical demographics in habitat  
108 specialists can help us predict the role that short and long-term dynamics play in shaping  
109 population genetic structure. In addition, describing spatial patterns of diversity and  
110 identifying independent evolutionary units, historical barriers to gene flow, bottlenecks  
111 and founder events, and regions of high connectivity allows the effects of contemporary  
112 pressures to be disentangled from historical drivers and also provides important  
113 information for the future management and conservation of species.

114         The dunes sagebrush lizard, *Sceloporus arenicolus*, is endemic to the Mescalero and  
115 Monahans Sandhills ecosystem of southeastern New Mexico and adjacent Texas (Fitzgerald  
116 and Painter, 2009; Laurencio and Fitzgerald, 2010). This species is part of the *Sceloporus*  
117 *graciosus* clade (Chan et al., 2013), but in contrast to other members of this group which  
118 tend to be geographically widespread generalists, *S. arenicolus* is a habitat specialist.

119 Within this ecosystem, it only uses shinnery-oak sand dune formations with interconnected

120 dune blowouts (sandy depressions created by wind) and in some cases shinnery  
121 hummocks in dunes with steep slopes (Fitzgerald et al., 1997; Laurencio and Fitzgerald,  
122 2010; Hibbitts et al., 2013). In the Mescalero-Monahans Sandhills Ecosystem, dune  
123 blowouts are emergent landforms that are maintained by the interactions among wind,  
124 moving sand, and the shinnery oak (*Quercus havardii*) which stabilizes the dunes (Ryberg  
125 and Fitzgerald, 2016). Individual *S. arenicolus* lizards demonstrate a nested hierarchy of  
126 habitat selection (Fitzgerald et al., 1997), selecting for thermally suitable microhabitats and  
127 having preference for relatively large dune blowouts. A sand-diving species, they do not  
128 occur in areas with relatively fine sand (Fitzgerald et al. 1997; Ryberg and Fitzgerald  
129 2015). At the highest level of habitat selection, they are endemic to the narrowly  
130 distributed Mescalero-Monahans Sandhills (Fitzgerald and Painter, 2009).

131 Specialists can reach high population densities in their preferred habitat, and can  
132 outcompete generalists in the same area even in some degraded habitats (Brown, 1984;  
133 Attum et al., 2006). This is true too for *S. arenicolus*, where populations of this ecological  
134 specialist thrive where the configuration of key landscape features supports larger groups  
135 of interacting individuals, defined as neighborhoods (*sensu* Wright, 1946; Ryberg et al.,  
136 2013). Diffusion dispersal throughout interconnected areas of suitable habitat appear key  
137 to maintaining populations in contiguous habitat over the long term (Ryberg et al., 2013).  
138 The quantity of habitat is positively correlated with the quality of habitat (Smolensky and  
139 Fitzgerald, 2011), and the occurrence of *S. arenicolus* is associated with relatively large core  
140 areas of shinnery oak dunes.

141 Since at least the 1930s, anthropogenic disturbances from herbicide spraying, oil  
142 and gas mining, and more recently, sand-mining, have resulted in fragmentation and

143 degradation of the shinnery oak dunes. Long-term monitoring and extensive fieldwork also  
144 demonstrate that fragmentation of the shinnery oak dunelands leads directly to population  
145 collapse because quality of habitat tends to degrade in response to fragmentation, and  
146 dispersal is disrupted (Leavitt and Fitzgerald, 2013; Walkup et al., 2017).

147         To adequately inform conservation and management actions, it is necessary to  
148 understand the evolutionary history of this species at both broad and fine-scales  
149 throughout the range. Previous genetic work confirmed that at broad spatial scales, *S.*  
150 *arenicolus* is comprised of at least three distinct genetic groups (Chan et al., 2009).  
151 However, it is unclear where these genetic breaks occur geographically and whether they  
152 coincide with putative natural or man-made barriers to movement. The purpose of this  
153 study is to characterize the evolutionary history of the dunes sagebrush lizard using  
154 complete geographic and genetic sampling. To identify evolutionary distinct geographic  
155 lineages and to reconstruct the population history of these lineages, we evaluate  
156 mitochondrial and nuclear sequence data as well as multilocus microsatellite genotypes.  
157 Sampling for individuals occurred evenly throughout the entire known range of this  
158 endemic and threatened lizard.

159

## 160 **Materials and Methods**

### 161 *Sampling*

162         We surveyed for *Sceloporus arenicolus* throughout their range (Figure 1). Liver or  
163 muscle tissue was collected from vouchered specimens deposited in the Biodiversity  
164 Research and Teaching Collections (symbolic code: TCWC), or Museum of Southwestern  
165 Biology (MSB). Additionally, toe and/or tail tips were collected non-destructively from



166 animals caught in the field that were subsequently released. All tissue samples were stored  
167 in 95% EtOH. Whole genomic DNA was extracted from tissues using the DNeasy Blood and  
168 Tissue kit (Qiagen).

169

#### 170 *DNA sequence data*

171 We targeted two mitochondrial and four nuclear loci for DNA sequencing. PCR  
172 amplification of the mitochondrial loci NADH-dehydrogenase 1 (*ND1*) and cytochrome-b  
173 (*cyt-b*) and two protein coding nuclear loci prolactin receptor (*PRLR*) and *R35* used  
174 previously published primers (Irwin et al., 1991; Leaché and McGuire, 2006; Leaché, 2010).  
175 We used two additional anonymous nuclear loci designed from a genomic library enriched  
176 for microsatellite repeats: *sarANL298* (scar298anl.F: 5'-ATGGGAAGGCTTAAAATGAATC;  
177 scar298anl.R: 5'-TGTGACTTAGGGAACTGGGTATGT) and *sarANL875* (scar875anl.F 5'-  
178 CTTACCATTCAACCCTTCCTTG; scar875anl.R 5'-CTAGAGCAGACCAGTTCAATGTAAT). All  
179 PCR were conducted in 10 µl total volume. Annealing temperature for the new nuclear loci  
180 was 54°C.

181 We used 0.4 µl ExoSAP-IT (USB/Affymetrix) and 1.6 µl water to clean 5 µl of PCR  
182 product. One µl of clean PCR template was used in each cyclo-sequencing reaction using the  
183 same locus-specific primers used in amplification. Sequencing reactions were cleaned and  
184 run on an ABI 3730xl at the Duke Sequencing Facility or the Biotechnology Resources  
185 Center of Cornell University. Chromatograms were verified and cleaned in Geneious R9  
186 (<https://www.geneious.com>). Heterozygous sites in nuclear sequences were called with  
187 the appropriate ambiguity code. Sequences at each locus were aligned using the MAFFT  
188 (Kato, 2005) plug-in in Geneious. All sequence data will be submitted to GenBank.

189           Because the mitochondrion is inherited as a single unit without recombination, we  
190 concatenated the two loci (ND1 and Cyt-*b*) into a single alignment. Each of the four nuclear  
191 loci were treated independently. All sequences at each locus were aligned in Geneious and  
192 alleles at nuclear loci were determined using the program PHASE (Stephens et al., 2001)  
193 and the helper program SeqPHASE (Flot, 2010).

194

#### 195 *Microsatellite genotype data*

196           Nuclear microsatellite loci were developed from a 454-library enriched for  
197 microsatellite motifs developed at Cornell University Evolutionary Genetics Core Facility.  
198 After initial screening of loci, we used the Qiagen Type-It microsatellite PCR kit to genotype  
199 individuals at these loci in five multiplex reactions (Supp. Mat. Table 1). Forward primers  
200 for all loci were tagged with a fluorescent dye and samples were genotyped on an  
201 ABI3730xl at the Biotechnology Resource Center of Cornell University with GeneScan 500  
202 LIZ size standard (Thermo Scientific). Alleles were called and verified for all individuals  
203 using GeneMarker 2.6. Prior to subsequent genetic analyses, all variable loci were tested  
204 for the presence of null alleles and selection by testing for Hardy-Weinberg Equilibrium  
205 (HWE) and for evidence of linkage disequilibrium using GenePop (Rousset, 2007). The final  
206 dataset included genotypes for all individuals at 27 variable and neutrally evolving nuclear  
207 microsatellite loci.

208

#### 209 *Data analysis*

#### 210 *Summary statistics*

211 We used PAUP (Swofford, 2002) to determine the number of parsimony informative  
212 sites for each sequence alignment and DNAsp v6 (Rozas et al., 2017) to calculate the  
213 number of unique haplotypes, the number of segregating sites ( $S$ ), nucleotide diversity ( $\pi$ ),  
214 and the average number of nucleotide differences ( $k$ ) for each sequence alignment.

215

### 216 *Haplotype networks*

217 We constructed parsimony networks in TCS (Clement et al., 2000) for complete  
218 mtDNA haplotypes for *S. arenicolus*. Because the results generated by network methods can  
219 be strongly influenced by missing data (Joly et al., 2007), we first omitted all individuals  
220 with missing sequence data for one of the two mitochondrial loci. We additionally omitted  
221 individuals for which we did not have locality information. The final haplotype network for  
222 mtDNA contained 195 individuals. We additionally constructed parsimony networks for  
223 the phased alleles at each nuclear locus.

224

### 225 *Phylogenetic analysis*

226 For the mitochondrial DNA, we estimated the phylogenetic relationships among *S.*  
227 *arenicolus* under both maximum likelihood and Bayesian frameworks. *Urosaurus ornatus*,  
228 *Uta stansburiana*, *Phrynosoma coronatum*, *Sceloporus jarrovii*, *S. merriami*, *S. occidentalis*,  
229 and nine individuals of *S. graciosus* were used as outgroups (following Chan et al., 2013).  
230 Concatenated mtDNA alignments were first reduced to unique sequences using a Python  
231 script from BioPython (sequence\_cleaner.py). We estimated the best-fit model of sequence  
232 evolution at each codon position of each gene in DT-ModSel (Minin et al., 2003) and  
233 partitioned phylogenetic analyses by gene and codon position. The best fit models by DT-

234 ModSel were a SYM+G for the first codon position of each gene, HKY+I for the second codon  
235 position of each gene, and TrN + I + G and TrN + G for the third codon position of *ND1* and  
236 *Cyt-b* respectively. We estimated the phylogeny under a Bayesian framework in MrBayes  
237 v3.2.6 (Ronquist and Huelsenbeck, 2003; Ronquist et al., 2012) excluding individuals with  
238 missing data. TrN models were expanded to GTR for Bayesian analyses and the final  
239 analysis consisted of two independent runs each of 50 million generations sampled every  
240 5,000 generations. All parameters were checked for adequate mixing and convergence, and  
241 the maximum clade credibility tree was summarized in MrBayes.

242

#### 243 *Population genetic analysis*

244 We estimated within population diversity and among population pairwise  $F_{ST}$  for  
245 mtDNA as well as microsatellite data assuming membership to the phylogroups based on  
246 the Bayesian phylogeny. Estimates of  $F_{ST}$  were done in Arlequin (Excoffier and Lischer,  
247 2010) for mtDNA and in FSTAT for microsatellite data. Because samples were distributed  
248 evenly throughout the range of *S. arenicolus*, we additionally conducted population genetic  
249 analyses without any assumption of population membership using assignment methods in  
250 Structure 2.3.4 (Pritchard et al., 2000). In Structure, we tested assignment of all individuals  
251 to  $K$  populations from  $K=1$  to 10. At each  $K$  we conducted 10 replicate runs each consisting  
252 of 1 million generations with the first 50% discarded as burn-in. We used  
253 StructureHarvester (Earl and vonHoldt, 2011) to examine all runs and CLUMPP (Jakobsson  
254 and Rosenberg, 2007) and DISTRUCT (Rosenberg, 2004) to visualize population  
255 membership. Structure runs with all individuals supported  $K=2$ , so subsequent runs  
256 investigated further partitioning with each major group. For each subset of data, we tested

257 K=1 to 5 each with 10 replicate runs at each K each consisting of 2 million runs with the  
258 first 50% discarded as burn-in.

259

### 260 *Demographic analyses*

261 We estimated the historical demographics for each of five primary phylogeographic  
262 regions (A-E) identified in mtDNA analyses. We used multilocus sequence data to construct  
263 extended Bayesian skyline plots in BEAST 2.5.0 (Drummond et al., 2005, 2012; Heled and  
264 Drummond, 2008). Each dataset included concatenated mtDNA alignments in addition to  
265 phased genotypes for each of the four nuclear loci. Substitution models for each locus were  
266 set based on MrModeltest (Nylander, 2004; Supp. Mat. Table 2). All runs assumed a relaxed  
267 molecular clock with a log-normal distribution for the mtDNA partition and strict  
268 molecular clocks for the nuclear partitions. The rate for mtDNA was set with a log normal  
269 distribution with mean of  $1 \times 10^{-8}$  substitutions/site/year and SD of 0.27 following (Chan et  
270 al., 2013). Parameter trends were examined in Tracer to check for adequate mixing within  
271 runs and convergence across runs. Final runs were 50 million steps sampled every 5,000  
272 steps for regions B, C, and E. The final runs for regions A and D were 100 and 200 million  
273 steps sampled every 10,000 and 20,000 steps, respectively. Extended Bayesian skyline  
274 plots we generated after discarding the first 25% sampled steps as burn-in.

275

### 276 *Hypothesis testing*

277 Based on the results of phylogenetic analyses and assignment tests, we tested three  
278 alternative hypotheses of divergence and population expansion among three geographic  
279 groups (Northern Mescalero Sands, Southern Mescalero Sands, and Monahans Sandhills)

280 assuming that the Monahans Sandhills populations were ancestral and of constant  
281 population size (Chan et al., 2009; Supp. Mat. Figure 1). We used approximate Bayesian  
282 computation to evaluate support for these models and estimate demographic parameters  
283 of the best supported model in DIYABC (Cornuet et al., 2008). Analyses included mtDNA  
284 and phased nuclear sequences. Locus parameters were specified after estimation of  
285 substitution models for each locus in DT-ModSel. The prior for the mtDNA mutation rate  
286 was set as a normal distribution with a mean of  $1 \times 10^{-8}$  substitutions per site per year and  
287 nuclear substitution rates were set as uniform distributions. Initial runs were used to  
288 determine adequate priors for demographic parameters. The final analysis included 2  
289 million samples for each divergence model (6 million total) with a linear regression step to  
290 extract the closest 1% of samples and determine the best supported model of the three. For  
291 the best supported model, we used the same selection/rejection process to estimate  
292 divergence times and demographic parameters from the closest 1% of the 2 million  
293 samples.

294

## 295 **Results**

### 296 **Summary statistics**

297 Sample sizes, alignment lengths, the number of unique haplotypes, number of  
298 segregating sites, average nucleotide differences, and nucleotide diversity are reported in  
299 Supp. Mat. Table 3. As expected, nuclear loci were less variable than mtDNA though  
300 nucleotide diversity was similar for mtDNA and two nuclear loci. We also recovered  
301 multilocus genotypes for 237 individuals at 27 microsatellite loci that conformed to HWE

302 expectations and did not show any evidence of linkage or null alleles. The average number  
303 of alleles per locus was 16.4 with a range from 3 to 35 (Supp. Mat. Table 4).

304

### 305 *Haplotype networks and phylogenetics*

306 Mitochondrial haplotype networks revealed geographically associated haplotype  
307 groups for mtDNA that largely correspond to regions of grossly contiguous habitat (Figure  
308 2). In the Northern Mescalero Sands, there are three main haplotype groups corresponding  
309 largely with the A regions (Figure 1; AA and AB), the B regions (BA and BB), and the C  
310 region, though the genetic divergence among these three groups is small. Common  
311 haplotypes are shared across regions, but derived haplotypes are unique to each region.  
312 Regions AB and BB have genetic diversity that is primarily a subset of the diversity found in  
313 AA and BA, respectively. The Southern Mescalero Sands (Regions DA and DB) are  
314 genetically divergent from the Northern Mescalero Sands populations with the barrier  
315 between the two groups reflecting a west-east constriction in the distribution of potentially  
316 suitable habitat (referred hereafter as “the Skinny Zone”). Among the Southern Mescalero  
317 Sands individuals in region DA, we find a single widespread haplotype and multiple derived  
318 haplotypes. In addition, region DB at southernmost tip of the Southern Mescalero Sands  
319 contains a cluster of derived haplotypes.

320 Populations in the Monahans Sandhills are genetically distinct from all other *S.*  
321 *arenicolus* populations, but do not form a single haplotype group. There is high sequence  
322 divergence among haplotypes from the Monahans Sandhills despite occurring in a  
323 relatively restricted geographic area and they are distantly related to Mescalero Sands  
324 haplotypes. The EA and EC areas each have unique haplotypes without a single, most

325 common haplotype. The EB haplotypes fall out into two main groups, one that is equally  
326 distant to northern and southern Mescalero Sands haplotypes and one that is distantly  
327 related to all other recovered haplotypes (Figure 2).

328 In general, nuclear gene regions had much lower genetic diversity with very little  
329 genetic structure (Supp. Mat. Figure 2). Across all four nuclear loci, we found a similar  
330 pattern with the most common haplotypes occurring in most, or all regions. At PRLR and  
331 scar875, several derived loci were unique to Monahans Sandhills populations and  
332 Monahans Sandhills plus Southern Mescalero Sands populations. With one exception (AB  
333 locus R35) regions AA, AB, and BB did not have any unique nuclear alleles.

334 Phylogenetic reconstructions largely corroborated the groups found in the network  
335 analyses (Figure 3). We recover *S. arenicolus* as monophyletic (PP = 1). Monahans Sandhills  
336 populations were paraphyletic with respect to Mescalero Sands populations with the  
337 southern-most Monahans Sandhills individuals forming a weakly supported clade (PP =  
338 0.8657) sister to all other *S. arenicolus*. Among the remaining individuals, there is strong  
339 support for a Northern Mescalero Sands clade including individuals north of the skinny  
340 zone (PP = 0.9758) and moderate support for a Southern Mescalero Sands – Monahans  
341 Sandhills clade that includes individuals south of the skinny zone and the northern and  
342 central Monahans Sandhills (PP = 0.9345). Within the Northern Mescalero Sands clade, we  
343 recover support for some clusters of individuals, but do not find well-supported clades  
344 corresponding to distinct geographic regions. Individuals from region A, at the northern  
345 end of the range, form a basal polytomy relative to otherwise well-supported clades  
346 containing most individuals from regions B and C, and several from region A and one from  
347 D (TCWC 94831). Support for a clade that includes most B individuals is high (PP = 0.9639)



348 as is support for two different clades that each primarily include individuals from C (PP =  
349 1). We do not recover very much genetic resolution for individuals south of the skinny zone  
350 in the Southern Mescalero Sands or the northern or central Monahans Sandhills. Notably,  
351 individuals from Monahans Sandhills are paraphyletic and their relationships largely  
352 unresolved. While most individuals from regions cluster with other individuals from the  
353 same region, as expected from the haplotype network, there are a few individuals that fall  
354 out with individuals from different regions.

355

### 356 *Demographic estimates*

357 Extended Bayesian skyline plots match the inferences made from the haplotype  
358 networks (Supp. Mat. Figure 3). We see evidence of recent population expansion in region  
359 D and demographic stability in region E. Regions A, B, and C show some evidence of  
360 population expansion though the credible intervals around the most recent population  
361 sizes is large and does not exclude the possibility of demographic stability.

362

### 363 *Population Genetics*

364 Pairwise  $F_{ST}$  among populations was high among regions with values significantly  
365 different from zero ranging from 0.099 to 0.904 for mtDNA and 0.026 to 0.236 based on  
366 microsatellite loci (Table 1).

367 Assignment tests based on microsatellite data reveal nested structure at multiple  
368 spatial scales (Figure 4). Across all samples, our analyses recover two groups with some  
369 admixture. The geographic break between these two groups corresponded to the Skinny  
370 Zone of the Mescalero Sands with some individuals in this area being admixed. Further

371 assignment tests in Structure with nested subsets of the data indicate that these admixed  
372 individuals are aligned with individuals in the Southern Mescalero Sands. We recover  
373 distinctive groups in the Northern Mescalero Sands with some admixture as well. Region A  
374 individuals are distinct from region B + C individuals although, assignment plots suggest  
375 some admixture between western A populations (AA) and populations in region C,  
376 corroborating results from the mtDNA haplotype networks. Analysis of the AA-AB groups  
377 recover AB as genetically distinct corroborating  $F_{ST}$  estimates (Table 1). Analysis of the BA-  
378 BB-C group supports BB and C as distinct from one another with BA having genetic  
379 affinities to both. Together these results show a clear genetic break between the Southern  
380 Mescalero Sands and Monahans Sandhills populations. For the Southern Mescalero Sands  
381 populations there is an additional genetic break between regions DA and DB coinciding  
382 with another constriction in suitable habitat. Among Monahans Sandhills samples, EA  
383 individuals are largely distinct from EB+EC. Individuals from EB and EC are somewhat  
384 distinct from one another though not all individuals within a region cluster unambiguously  
385 with others in the group.

386

### 387 *Hypothesis testing*

388 We recover strongest support (PP = 0.9991) for a divergence scenario that involved  
389 colonization of the Northern Mescalero Sands from Monahans Sandhills populations  
390 around 34.8 Kya (CI 17.7-108 Kya) followed by colonization of the Southern Mescalero  
391 Sands from Monahans Sandhills populations more recently, around 16.3 Kya (CI 7.9-41  
392 Kya; Figure 5). It is possible that the initial colonization of Northern Mescalero Sands  
393 included colonization of the Southern Mescalero Sands, with subsequent local extinction

394 and recolonization, or genetic replacement. It is important to note that the 95% credible  
395 intervals for all estimates of divergence time and population size are broad. In fact, though  
396 the time of expansion in the Northern Mescalero Sands ( $T_{exp1}$ ) was constrained in individual  
397 ABC simulations to occur after the divergence between the Northern Mescalero Sands and  
398 the other regions ( $T_{anc}$ ), the median estimate for the former  $T_{exp1}$  precedes the median  
399 divergence time,  $T_{anc}$  (Figure 5), though both estimates have extremely broad and  
400 overlapping credible intervals.

401

## 402 **Discussion**

403         Sampling of *S. arenicolus* throughout the entire range provides greater resolution of  
404 the evolutionary patterns of divergence of this narrowly distributed habitat specialist. We  
405 find support for multiple genetic groups within *S. arenicolus* suggesting limited migration  
406 in this habitat specialist. In particular, we find genetic structure beyond the three  
407 mitochondrial groups described in Chan et al. (2009). Patterns of divergence recovered by  
408 mtDNA corroborate nuclear microsatellite data and demonstrate the importance of the  
409 landscape-scale configuration of areas of habitat on the phylogeographic structure of this  
410 habitat specialist. With thorough geographic sampling we are able to identify regions that  
411 have served as barriers to population connectivity and characterize historical  
412 demographics across evolutionary time scales.

413         Lineages of *S. arenicolus* in the Mescalero Sands and Monahans Sandhills have  
414 independent and distinct histories that are associated with the timing of sand deposition  
415 and dune formation in these sub-regions. Indeed, the Mescalero Sands and Monahans  
416 Sandhills have related, but distinguishable geologic histories (Muhs and Holliday, 2001;

417 Rich and Stokes, 2011; Muhs, 2017). Both Mescalero Sands and Monahans Sandhills are  
418 sand sheets of the Southern High Plains deposited over older, compact eolian deposits  
419 comprising the Black Water Draw formation (204 - 43 Kya; Rich and Stokes, 2011). Sand  
420 accumulation and dune formation has occurred repeatedly with current sand sheet age  
421 estimates for Mescalero and Monahans as 29.2 and 22.2 Kya respectively and with a more  
422 recent deposition ~ 7.5 Kya (Rich and Stokes, 2011). Though *S. arenicolus* sampled from  
423 the Monahans Sandhills do not form a monophyletic group, it is clear that they are distinct  
424 from Mescalero Sands populations with estimated initial divergence between these two  
425 regions occurring long ago (34.8 Kya, CI 108-17.7 Kya; Figure 5). While the estimated  
426 divergence is older than the estimated age of the most recent sand deposition, this is a  
427 dynamic landscape that has undergone cycles of sand deposition during periods of aridity  
428 (Holliday, 1989; Rich and Stokes, 2011) such that this divergence is most likely associated  
429 with previous episodes of sedimentation and dune formation. There are broad CI around  
430 estimates of divergence and population expansion, but these estimates generally coincide  
431 with the sand age of Northern Mescalero Sands. Furthermore, the estimate of the most  
432 recent deposition falls within the CI for colonization and expansion times for the Southern  
433 Mescalero Sands.

434         The location and movement of sand dune formations has changed over millennia  
435 (Muhs and Holliday, 1995, 2001; Muhs, 2017). While the presence of sand dunes alone does  
436 not indicate the presence of shinnery oak-sand dune ecosystem, the distribution of habitat  
437 suitable to *S. arenicolus* has likely shifted in its occurrence and connectivity over geologic  
438 time. Given the dynamic nature of the landscape to which *S. arenicolus* is endemic, it stands  
439 to reason that dynamic histories also characterize the phylogeographic and population

440 genetic structure in this species. Though the age of the Mescalero Sands and Monahans  
441 Sandhills geologic formations are uncertain, our data suggest that Monahans Sandhills was  
442 the source population from which Mescalero Sands *S. arenicolus* populations were  
443 colonized. Mescalero Sands populations, which lie to the north of the Monahans Sandhills,  
444 are comprised of at least two distinct lineages, but nuclear microsatellite data and ABC  
445 analyses suggest that the Southern Mescalero Sands populations are more closely related  
446 to the Monahans Sandhills populations than to northern Mescalero Sands populations. The  
447 two sand formations are not currently connected by suitable habitat (Figure 1), but  
448 presumably were connected in the past facilitating the colonization of Mescalero Sands  
449 from Monahans Sandhills. by *S. arenicolus*. The current range map (Figure 1) is informed by  
450 currently occupied habitat, but given the dynamic history of the shinnery oak-sand dune  
451 ecosystem, potentially suitable habitat connecting regions may have occurred in the past.  
452 The configuration of available habitat is varies across time which presumably causes  
453 concordant shifts in species' distributions.

454 Our genetic data suggest that the colonization event associated with the current  
455 Southern Mescalero Sands populations occurred separately from the event that resulted in  
456 the Northern Mescalero Sands populations. Colonization of the Northern Mescalero Sands  
457 and divergence from the Monahans Sandhill source population is estimated to have  
458 occurred approximately 34 Kya followed by population expansion (Figure 5; Supp. Mat.  
459 Figure 3). While recognizing that there are broad confidence intervals around the  
460 estimated time of this event, it is plausible that this divergence was associated with the  
461 deposition of loose aeolian sands over the Blackwater Draw Formation (Rich and Stokes,  
462 2011). The second divergence was between the southern Mescalero Sands and Monahans

463 Sandhills occurring later, around 16.3 Kya. This is similar to the age of more recent sand  
464 deposits in the Mescalero Sands, and subsequent population expansion with a median  
465 estimate of 9.9 Kya coincides roughly with the ages of the most recent aeolian deposits.  
466 This result suggests that after the colonization of the Mescalero Sands 34 Kya by *S.*  
467 *arenicolus*, habitat between the Mescalero Sands and Monahans Sandhills contracted or  
468 that Southern Mescalero Sands populations became extirpated and this area was later  
469 recolonized. Both scenarios seem plausible given what we know about *S. arenicolus* ecology  
470 and the dynamic nature of this system.

471 *Sceloporus arenicolus* requires interconnected shinnery-oak blowouts to support  
472 populations (Ryberg et al., 2013; Leavitt and Fitzgerald, 2013). Shinnery oak flats or  
473 isolated dune blowouts impede movements and isolate populations. The divergences that  
474 we see across the Mescalero Sands and Monahans Sandhills correspond largely with the  
475 geographic extent of potentially suitable habitat identified in several studies of *S. arenicolus*  
476 (Fitzgerald et al., 1997; Laurencio and Fitzgerald, 2010; Walkup et al., 2018). We are also  
477 able to reconstruct historical population demography and recover variable, and sometimes  
478 dynamic, histories across populations of *S. arenicolus*. For instance, we find support for a  
479 major genetic break that coincides with the Skinny Zone, a narrow constriction (~ 3 km  
480 wide) in the central Mescalero Sands. This narrow zone of habitat for *S. arenicolus* is  
481 indicative of a long-standing barrier to dispersal and is now a point of secondary contact  
482 between divergent Northern and Southern Mescalero Sands populations.

483 We find shallow divergence, but distinct genetic diversity among the Northern  
484 Mescalero Sands regions indicating that habitat suitability also impacts population genetic  
485 connectivity at these finer spatial scales. Populations in some of these regions, like AB and

486 BB, have diverged in isolation, suggesting a founder effect in line with the major direction  
487 of sand dune movement (Muhs, 2017). We additionally confirm a recent colonization and  
488 subsequent rapid population expansion in the southern portion of the Mescalero Sands  
489 (Region D). Finally, among the Monahans Sandhills samples we documented highly  
490 divergent alleles, deep divergence among populations, and relative population stability. We  
491 recovered at least three divergent groups among the Monahans Sandhills individuals  
492 indicating limited movement among older populations retaining ancestral genetic diversity.

493         The historical demography and patterns of divergence are reflected in the  
494 microsatellite data as well as the more slowly evolving mtDNA sequence data indicating  
495 that population structure is the result of longstanding habitat dynamics and restrictions to  
496 gene flow at multiple spatial scales, not just more recent anthropogenic change.

497 Demographic studies of *S. arenicolus* have emphasized the importance of a network of  
498 suitable habitat at multiple spatial scales to support metapopulation dynamics and  
499 population persistence (Ryberg et al., 2014). Landscape-ecological analyses of presence  
500 and absence of lizard community membership across the Mescalero Sands demonstrated  
501 that landscape heterogeneity, not dispersal, explained community assembly and meta-  
502 community structure (Ryberg and Fitzgerald, 2015, 2016). The occurrence of the habitat  
503 specialist *S. arenicolus* was a driver of this pattern. As such, because the fine-scale  
504 distribution of suitable habitat is critical for local presence of *S. arenicolus*, we suggest the  
505 composition and configuration of the landscape with respect to unsuitable habitat types  
506 determines patterns of genetic connectivity across the range. The divergences we detect  
507 reinforce that extensive habitat may be necessary to support gene flow among populations  
508 and that habitat quality and habitat configuration at finer scales may be of critical

509 importance to identifying potential corridors. Importantly, it is clear that the shinnery oak-  
510 sand dune ecosystem is a dynamic landscape where the configuration of habitat patches  
511 can change over decades and millennia. We know from phylogeographic studies that  
512 specialists in changing environments undergo repeated episodes of isolation and  
513 divergence (Roderick et al., 2012). While it is impossible to reconstruct the specific,  
514 chronological habitat configuration for the Mescalero Sands and Monahans Sandhills, it is  
515 likely that networks of suitable habitat have diverged and coalesced repeatedly over time  
516 (e.g., Dzialak et al., 2013). Source-sink dynamics are important at local and contemporary  
517 spatial and temporal scales (Ryberg et al., 2013; Walkup et al., 2019), and this may  
518 translate to evolutionary patterns of population genetic structure at broader spatial scales  
519 and longer time scales. Under this model, habitat patches shift in their extent and  
520 distribution over time due to geological processes. The divergence and coalescence of  
521 habitat patches across time results in repeated local extinction, population divergence, and  
522 recolonization. In support of this scenario, we find population genetic and demographic  
523 patterns that reflect such dynamic processes and their variability across the landscape. For  
524 instance, the Southern Mescalero Sands is a more rapidly shifting sand dune formation  
525 (Muhs and Holliday, 1995, 2001; Muhs, 2017) in comparison to the sand sheets of the  
526 Monahans Sandhills formation which are more stable and less dynamic (Machenberg,  
527 1984). The Southern Mescalero Sands may be characterized by local extinction and  
528 recolonization whereas the slower movement of the Monahans Sandhills may maintain  
529 demographically stable and isolated populations over longer time periods.

530         The patterns of divergence and gene flow that we see in *S. arenicolus* are not  
531 surprising of a habitat specialist inhabiting a dynamic landscape. Based on demographic



532 studies (Leavitt and Fitzgerald, 2013; Walkup et al., 2019) and observations of *S. arenicolus*  
533 (Ryberg et al., 2012; Leavitt and Acre, 2014; Walkup et al., 2018, p. 2018; Young et al.,  
534 2018), individuals do not move large distances. Their strict habitat requirements, and the  
535 naturally patchy and temporally dynamic qualities of this habitat, suggests that populations  
536 should be subdivided. The nestedness of genetic structure in *S. arenicolus* mirrors the  
537 hierarchical nature of their habitat preference: individuals require suitable blowouts  
538 within a matrix of shinnery oak, and populations are supported by a network of connected  
539 shinnery oak-sand dune complexes. While the genetic consequences of metapopulation  
540 dynamics have typically been explored at fine spatial and temporal scales, our  
541 phylogeographic study shows that these metapopulation dynamics may also leave their  
542 signature at broader spatial scales, in this case, across the range of this endemic lizard.

543

#### 544 **Conservation**

545         The shinnery oak-sand dune habitats of Mescalero Sands and Monahans Sandhills  
546 have experienced severe habitat degradation and fragmentation, particularly in the  
547 southern portions of the range of *S. arenicolus* (Leavitt and Fitzgerald, 2013; Walkup et al.,  
548 2017). Recent ongoing fragmentation due to human activities (e.g. highways and caliche  
549 roads built for oil field development) is known to decrease connectivity among populations  
550 and interrupt metapopulation dynamics leading to extinction of local populations (Ryberg  
551 et al., 2013, 2014; Leavitt and Fitzgerald, 2013; Walkup et al., 2017). Fragmentation of the  
552 shinnery oak-sand dune ecosystem increases the likelihood that ancestral diversity and  
553 unique evolutionary lineages will be lost. Our findings highlight regions to be considered as

554 genetically distinctive conservation units as well as underscore the unique genetic and  
555 demographic history of different regions within the range of *S. arenicolus*.

556

## 557 **Acknowledgments**

558 Thank you to J. T. Giermakowski (MSB), R. Macey, C. Spencer (MVZ), and J. Vindum (CAS)  
559 for access to tissue samples. We thank the many research assistants who helped with tissue  
560 collection, DNA sequencing, and genotyping, including J. Moberg, E. Gibson, D. Cavero, and  
561 T. Caspi. Sequencing was conducted at the Genome Sequencing & Analysis Core Resource of  
562 the Duke Institute for Genome Sciences and Policy. Genotyping of microsatellite loci was  
563 completed at the Biotechnology Core Facility of Cornell University. Portions of this  
564 research were provided by the Dunes Sagebrush Lizard/ Lesser Prairie Chicken Candidate  
565 Conservation Agreement (CCA) Research Fund administered by CEHMM, Carlsbad, New  
566 Mexico, and by USA Bureau of Land Management, and by the State of Texas Comptroller of  
567 Public Accounts. This is contribution number xxxx of the Biodiversity Research and  
568 Teaching Collections, Texas A&M University.

569

## 570 **Literature Cited**

571 Attum, O., Eason, P., Cobbs, G., and Baha El Din, S.M. 2006. Response of a desert lizard  
572 community to habitat degradation: Do ideas about habitat specialists/generalists  
573 hold? *Biological Conservation* 133: 52–62.  
574 Brown, J.H. 1984. On the relationship between abundance and distribution of species.  
575 *American Naturalist* 124: 255–279.  
576 Chan, L.M., Archie, J.W., Yoder, A.D., and Fitzgerald, L.A. 2013. Review of the systematic  
577 status of *Sceloporus arenicolus* Degenhardt and Jones, 1972 with an estimate of  
578 divergence time. *Zootaxa* 3664: 312–320.  
579 Chan, L.M., Fitzgerald, L.A., and Zamudio, K.R. 2009. The scale of genetic differentiation in  
580 the Dunes Sagebrush-Lizard (*Sceloporus arenicolus*), an endemic habitat specialist.  
581 *Conservation Genetics* 10: 131–142.

- 582 Chan, L.M., and Zamudio, K.R. 2009. Population differentiation of temperate amphibians in  
583 unpredictable environments. *Molecular Ecology* 18: 3185–3200.
- 584 Clement, M., Posada, D., and Crandall, K.A. 2000. TCS: a computer program to estimate gene  
585 genealogies. *Molecular Ecology* 9: 1657–1659.
- 586 Clobert, J., Baguette, M., Benton, T.G., and Bullock, J.M. 2012. *Dispersal Ecology and*  
587 *Evolution*. Oxford University Press, Oxford, UK.
- 588 Cornuet, J.M., Santos, F., Beaumont, M.A., Robert, C.P., Marin, J.M., Balding, D.J., Guillemaud,  
589 T., and Estoup, A. 2008. Inferring population history with DIY ABC: a user-friendly  
590 approach to approximate Bayesian computation. 24: 2713–2719.
- 591 Cutter, A.D. 2013. Integrating phylogenetics, phylogeography and population genetics  
592 through genomes and evolutionary theory. *Molecular Phylogenetics and Evolution*  
593 69: 1172–1185.
- 594 Devictor, V., Julliard, R., and Jiguet, F. 2008. Distribution of specialist and generalist species  
595 along spatial gradients of habitat disturbance and fragmentation. *Oikos* 117: 507–  
596 514.
- 597 Drummond, A.J., Rambaut, A., Shapiro, B., and Pybus, O.G. 2005. Bayesian coalescent  
598 inference of past population dynamics from molecular sequences. 22: 1185–1192.
- 599 Drummond, A.J., Suchard, M.A., Xie, D., and Rambaut, A. 2012. Bayesian phylogenetics with  
600 BEAUti and the BEAST 1.7. 29: 1969–1973.
- 601 Dzialak, M.R., Houchen, D.J., Harju, S.M., and Mudd, J.P. 2013. Ecosystem-level dynamics of  
602 soil-vegetation features, with implications for conserving a narrowly endemic  
603 reptile. *Landscape Ecology* 28: 1371–1385.
- 604 Earl, D.A., and vonHoldt, B.M. 2011. STRUCTURE HARVESTER: a website and program for  
605 visualizing STRUCTURE output and implementing the Evanno method. *Conservation*  
606 *Genetics Resources* 4: 359–361.
- 607 Excoffier, L., and Lischer, H.E.L. 2010. Arlequin suite ver 3.5: a new series of programs to  
608 perform population genetics analyses under Linux and Windows. *Molecular Ecology*  
609 *Resources* 10: 564–567.
- 610 Fitzgerald, L., Painter, C., Sias, D., and Snell, H. 1997. The range, distribution, and habitat of  
611 *Sceloporus arenicolus* in New Mexico: final report submitted to the New Mexico  
612 Department of Game and Fish (Contract #80-516.6-01).
- 613 Fitzgerald, L.A., and Painter, C.W. 2009. Dunes Sagebrush Lizard (*Sceloporus arenicolus*). In  
614 *Lizards of the American Southwest: A Photographic Field Guide*. Edited by L.L.C.  
615 Jones and R.E. Lovich. Rio Nuevo Publishers, Tucson, Arizona. pp. 198–120.
- 616 Flot, J.-F. 2010. SeqPHASE: a web tool for interconverting phase input/output files and fasta  
617 sequence alignments. *Molecular Ecology Resources* 10: 162–166.
- 618 Heled, J., and Drummond, A. 2008. Bayesian inference of population size history from  
619 multiple loci. *BMC Evolutionary Biology* 8: 289.
- 620 Hibbitts, T.J., Ryberg, W.A., Adams, C.S., Fields, A.M., Lay, D., and Young, M.E. 2013.  
621 Microhabitat selection by a habitat specialist and a generalist in both fragmented  
622 and unfragmented landscapes. *Herpetological Conservation and Biology* 8: 104–113.
- 623 Holliday, V.T. 1989. The Blackwater Draw Formation (Quaternary): a 1.4-plus-m.y. record  
624 of eolian sedimentation and soil formation on the Southern High Plains. *Geological*  
625 *Society of America Bulletin* 101: 1598–1607.
- 626 Irwin, D.M., Kocher, T.D., and Wilson, A.C. 1991. Evolution of the cytochrome b gene of  
627 mammals. *Journal of Molecular Evolution* 32: 128–144.

- 628 Jakobsson, M., and Rosenberg, N.A. 2007. CLUMPP: a cluster matching and permutation  
629 program for dealing with label switching and multimodality in analysis of  
630 population structure.
- 631 Joly, S., Stevens, M.I., and van Vuuren, B.J. 2007. Haplotype networks can be misleading in  
632 the presence of missing data. *Systematic Biology* 56: 857–862.
- 633 Katoh, K. 2005. MAFFT version 5: improvement in accuracy of multiple sequence  
634 alignment. *Nucleic Acids Research* 33: 511–518.
- 635 Laurencio, L.R., and Fitzgerald, L.A. 2010. Atlas of distribution and habitat of the dunes  
636 sagebrush lizard (*Sceloporus arenicolus*) in New Mexico. *Texas Cooperative Wildlife*  
637 *Collection*.
- 638 Leaché, A.D. 2010. Species trees for spiny lizards (Genus *Sceloporus*): Identifying points of  
639 concordance and conflict between nuclear and mitochondrial data. 54: 162–171.
- 640 Leaché, A.D., and McGuire, J. 2006. Phylogenetic relationships of horned lizards  
641 (*Phrynosoma*) based on nuclear and mitochondrial data: Evidence for a misleading  
642 mitochondrial gene tree. 39: 628–644.
- 643 Leavitt, D.J., and Acre, M.R. 2014. *Sceloporus arenicolus*, activity patterns and foraging  
644 mode. *Herpetological Review* 45: 699–700.
- 645 Leavitt, D.J., and Fitzgerald, L.A. 2013. Disassembly of a dune-dwelling lizard community  
646 due to landscape fragmentation. *Ecosphere* 4: art97.
- 647 Lippé, C., Dumont, P., and Bernatchez, L. 2006. High genetic diversity and no inbreeding in  
648 the endangered copper redhorse, *Moxostoma hubbsi* (Catostomidae, Pisces): the  
649 positive sides of a long generation time. *Molecular Ecology* 15: 1769–1780.
- 650 Machenberg, M.D. 1984. Geology of Monahans Sandhills State Park, Texas. : 49.
- 651 Miles, D.B. 1994a. Population differentiation in locomotor performance and the potential  
652 response of a terrestrial organism to global environmental change. *American*  
653 *Zoologist* 34: 422–436.
- 654 Miles, D.B. 1994b. Covariation between morphology and locomotory performance in  
655 sceloporine lizards. In *Lizard Ecology: Historical and Experimental Perspectives*.  
656 Edited by L.J. Vitt and E.R. Pianka. Princeton University Press. pp. 207–235.
- 657 Minin, V., Abdo, Z., Joyce, P., and Sullivan, J. 2003. Performance-based selection of likelihood  
658 models for phylogeny estimation. *Systematic Biology* 52: 674–683.
- 659 Muhs, D.R. 2017. Evaluation of simple geochemical indicators of aeolian sand provenance:  
660 Late Quaternary dune fields of North America revisited. *Quaternary Science Reviews*  
661 171: 260–296.
- 662 Muhs, D.R., and Holliday, V.T. 1995. Evidence of active dune sand on the Great Plains in the  
663 19th century from accounts of early explorers. *Quaternary Research* 43: 198–208.
- 664 Muhs, D.R., and Holliday, V.T. 2001. Origin of late Quaternary dune fields on the Southern  
665 High Plains of Texas and New Mexico. *Geological Society of America Bulletin*: 13.
- 666 Nylander, J. 2004. MrModeltest v2. Program distributed by the author.
- 667 Olivieri, I., Tonnabel, J., Ronce, O., and Mignot, A. 2015. Why evolution matters for species  
668 conservation: perspectives from three case studies of plant metapopulations.  
669 *Evolutionary Applications* 9: 196–211.
- 670 Pierson, J.C., Allendorf, F.W., Drapeau, P., and Schwartz, M.K. 2013. Breed locally, disperse  
671 globally: fine-scale genetic structure despite landscape-scale panmixia in a fire-  
672 specialist. *PLoS ONE* 8: e67248.

- 673 Pritchard, J., Stephens, M., and Donnelly, P. 2000. Inference of population structure using  
674 multilocus genotype data. *Genetics* 155: 945–959.
- 675 Rich, J., and Stokes, S. 2011. A 200,000-year record of late Quaternary Aeolian  
676 sedimentation on the Southern High Plains and nearby Pecos River Valley, USA.  
677 *Aeolian Research* 2: 221–240.
- 678 Richmond, J.Q., Backlin, A.R., Tatarian, P.J., Solvesky, B.G., and Fisher, R.N. 2014. Population  
679 declines lead to replicate patterns of internal range structure at the tips of the  
680 distribution of the California red-legged frog (*Rana draytonii*). *Biological  
681 Conservation* 172: 128–137.
- 682 Richmond, J.Q., Barr, K.R., Backlin, A.R., Vandergast, A.G., and Fisher, R.N. 2013.  
683 Evolutionary dynamics of a rapidly receding southern range boundary in the  
684 threatened California Red-Legged Frog (*Rana draytonii*). *Evolutionary Applications*  
685 6: 808–822.
- 686 Rissler, L.J. 2016. Union of phylogeography and landscape genetics. *PNAS* 113: 8079–8086.
- 687 Roderick, G.K., Croucher, P.J.P., Vandergast, A.G., and Gillespie, R.G. 2012. Species  
688 Differentiation on a Dynamic Landscape: Shifts in Metapopulation Genetic Structure  
689 Using the Chronology of the Hawaiian Archipelago. *Evol Biol* 39: 192–206.
- 690 Ronquist, F., and Huelsenbeck, J. 2003. MrBayes 3: Bayesian phylogenetic inference under  
691 mixed models. 19: 1572–1574.
- 692 Ronquist, F., Teslenko, M., van der Mark, P., Ayres, D.L., Darling, A., Höhna, S., Larget, B., Liu,  
693 L., Suchard, M.A., and Huelsenbeck, J.P. 2012. MrBayes 3.2: efficient Bayesian  
694 phylogenetic inference and model choice across a large model space. *Systematic  
695 Biology* 61: 539–542.
- 696 Rosenberg, N. 2004. DISTRUCT: a program for the graphical display of population  
697 structure. *Molecular Ecology Notes* 4: 137–138.
- 698 Rousset, F. 2007. Genepop'007: a complete re-implementation of the Genepop software for  
699 Windows and Linux. *Molecular Ecology Notes* 8: 103–106.
- 700 Rozas, J., Ferrer-Mata, A., Sánchez-DelBarrio, J.C., Guirao-Rico, S., Librado, P., Ramos-Onsins,  
701 S.E., and Sánchez-Gracia, A. 2017. DnaSP 6: DNA Sequence Polymorphism Analysis  
702 of Large Data Sets. *Molecular Biology and Evolution* 34: 3299–3302.
- 703 Ryberg, W.A., and Fitzgerald, L.A. 2015. Sand grain size composition influences subsurface  
704 oxygen diffusion and distribution of an endemic, psammophilic lizard: Oxygen  
705 diffusion in sand limits lizard distribution. *J Zool* 295: 116–121.
- 706 Ryberg, W.A., and Fitzgerald, L.A. 2016. Landscape composition, not connectivity,  
707 determines metacommunity structure across multiple scales. *Ecography* 39: 932–  
708 941.
- 709 Ryberg, W.A., Hill, M.T., Lay, D., and Fitzgerald, L.A. 2012. Observations on the nesting  
710 ecology and early life history of the Dunes Sagebrush Lizard (*Sceloporus arenicolus*).  
711 *Western North American Naturalist* 72: 582–585.
- 712 Ryberg, W.A., Hill, M.T., Painter, C.W., and Fitzgerald, L.A. 2013. Landscape pattern  
713 determines neighborhood size and structure within a lizard population. *PLoS ONE* 8:  
714 e56856.
- 715 Ryberg, W.A., Hill, M.T., Painter, C.W., and Fitzgerald, L.A. 2014. Linking irreplaceable  
716 landforms in a self-organizing landscape to sensitivity of population vital rates for  
717 an ecological specialist. *Conservation Biology* 29: 888–898.



- 718 Schär, S., Eastwood, R., Arnaldi, K.G., Talavera, G., Kaliszewska, Z.A., Boyle, J.H., Espeland, M.,  
719 Nash, D.R., Vila, R., and Pierce, N.E. 2018. Ecological specialization is associated with  
720 genetic structure in the ant-associated butterfly family Lycaenidae. *Proc. R. Soc. B*  
721 285: 20181158.
- 722 Smolensky, N.L., and Fitzgerald, L.A. 2011. Population variation in dune-dwelling lizards in  
723 response to patch size, patch quality and oil and gas development. *The Southwestern*  
724 *Naturalist* 56: 315–324.
- 725 Stephens, M., Smith, N.J., and Donnelly, P. 2001. A new statistical method for haplotype  
726 reconstruction from population data. *American Journal Of Human Genetics* 68: 978–  
727 989.
- 728 Swofford, D. 2002. PAUP\*, Phylogenetic Analysis Using Parsimony (\* and Other Methods).  
729 In 2nd edition. Edited By P. Lemey, M. Salemi, and A.-M. Vandamme. Cambridge  
730 University Press, Cambridge.
- 731 Vandergast, A.G., Bohonak, A.J., Hathaway, S.A., Boys, J., and Fisher, R.N. 2008. Are hotspots  
732 of evolutionary potential adequately protected in southern California? *Biological*  
733 *Conservation* 141: 1648–1664.
- 734 Vandergast, A.G., Bohonak, A.J., Weissman, D.B., and Fisher, R.N. 2007. Understanding the  
735 genetic effects of recent habitat fragmentation in the context of evolutionary history:  
736 phylogeography and landscape genetics of a southern California endemic Jerusalem  
737 cricket (Orthoptera: Stenopelmatidae: *Stenopelmatus*). *Molecular Ecology* 16: 977–  
738 992.
- 739 Walkup, D.K., Leavitt, D.J., and Fitzgerald, L.A. 2017. Effects of habitat fragmentation on  
740 population structure of dune-dwelling lizards. *Ecosphere* 8: e01729.
- 741 Walkup, D.K., Ryberg, W.A., Fitzgerald, L.A., and Hibbitts, T.J. 2018. Occupancy and  
742 detection of an endemic habitat specialist, the dunes sagebrush lizard (*Sceloporus*  
743 *arenicolus*). *Herpetological Conservation and Biology* 13: 497–506.
- 744 Walkup, D.K., Ryberg, W.A., Fitzgerald, L.A., and Hibbitts, T.J. 2019. From the ground up:  
745 microhabitat use within a landscape context frames the spatiotemporal scale of  
746 settlement and vacancy dynamics in an endemic habitat specialist. *Landscape Ecol*  
747 34: 2631–2647.
- 748 Wort, E.J.G., Chapman, M.A., Hawkins, S.J., Henshall, L., Pita, A., Rius, M., Williams, S.T., and  
749 Fenberg, P.B. 2019. Contrasting genetic structure of sympatric congeneric  
750 gastropods: Do differences in habitat preference, abundance and distribution  
751 matter? *J Biogeogr* 46: 369–380.
- 752 Wright, S. 1946. Isolation by distance under diverse systems of mating. *Genetics* 31: 39–59.
- 753 Young, M.E., Ryberg, W.A., Fitzgerald, L.A., and Hibbitts, T.J. 2018. Fragmentation alters  
754 home range and movements of the Dunes Sagebrush Lizard (*Sceloporus arenicolus*).  
755 *Can. J. Zool.* 96: 905–912.

756  
757

758 **Tables**

759

760 Table 1. Pairwise  $F_{ST}$  values among regions for microsatellite genotypes (above diagonal)  
761 and mitochondrial sequence data (below diagonal). Values significantly different from zero  
762 (at  $\alpha < 0.05$ ) are indicated in bold. The significance of some values was not able to be  
763 determined because of low genetic variability, indicated with italics.

|    | AA            | AB            | BA            | BB            | C             | DA            | DB            | EA            | EB            | EC            |
|----|---------------|---------------|---------------|---------------|---------------|---------------|---------------|---------------|---------------|---------------|
| AA |               | <b>0.0807</b> | <b>0.0349</b> | <i>0.0689</i> | <b>0.0358</b> | <b>0.1443</b> | <b>0.1723</b> | <b>0.1488</b> | <b>0.1654</b> | <b>0.1457</b> |
| AB | 0.0279        |               | 0.1077        | <i>0.1911</i> | 0.0749        | <b>0.1988</b> | 0.2374        | 0.2080        | 0.2356        | 0.2010        |
| BA | <b>0.3389</b> | <b>0.3151</b> |               | <i>0.0512</i> | <b>0.0264</b> | <b>0.1337</b> | <b>0.1594</b> | <b>0.1349</b> | <b>0.1388</b> | <b>0.1033</b> |
| BB | <b>0.6593</b> | <b>0.7667</b> | <b>0.2147</b> |               | <i>0.0807</i> | <i>0.1643</i> | <i>0.2116</i> | <i>0.1688</i> | <i>0.1830</i> | <i>0.1592</i> |
| C  | <b>0.4102</b> | <b>0.3688</b> | <b>0.4605</b> | <b>0.6583</b> |               | <b>0.1271</b> | <b>0.1523</b> | <b>0.1213</b> | <b>0.1350</b> | <b>0.1071</b> |
| DA | <b>0.8466</b> | <b>0.8584</b> | <b>0.8083</b> | <b>0.8687</b> | <b>0.8503</b> |               | <b>0.0411</b> | <b>0.0882</b> | <b>0.1188</b> | <b>0.0990</b> |
| DB | <b>0.8381</b> | <b>0.8395</b> | <b>0.7483</b> | <b>0.8439</b> | <b>0.8173</b> | <b>0.3311</b> |               | <b>0.1213</b> | <b>0.1554</b> | 0.1302        |
| EA | <b>0.7984</b> | <b>0.7723</b> | <b>0.7372</b> | <b>0.7842</b> | <b>0.7858</b> | <b>0.5767</b> | <b>0.4206</b> |               | <b>0.1188</b> | <b>0.1017</b> |
| EB | <b>0.5554</b> | <b>0.4000</b> | <b>0.5021</b> | <b>0.4513</b> | <b>0.5523</b> | <b>0.6668</b> | <b>0.4663</b> | <b>0.5302</b> |               | 0.0701        |
| EC | <b>0.8406</b> | <b>0.8125</b> | <b>0.7540</b> | <b>0.8216</b> | <b>0.8099</b> | <b>0.8872</b> | <b>0.8424</b> | <b>0.8108</b> | <b>0.4119</b> |               |

764

765

766 **Figure Legends**

767 Figure 1. Collection localities for samples of *S. arenicolus* from New Mexico included in this  
768 study and the outline of the species' range and suitable shinnery oak-sand dune habitat  
769 (from Laurencio and Fitzgerald, 2010). Specific localities are not shown for Texas due to  
770 legal confidentiality agreements with landowners. Colored portions of the species' range  
771 correspond to phylogroups and geographic regions referred to in text. Brown indicates  
772 potential habitat in Texas where *S. arenicolus* has not been found; one locality exists in this  
773 region from 1970. Presence/absence data and habitat suitability maps could be used to  
774 more precisely delineate geographic boundaries of the phylogroups within areas of suitable  
775 habitat.

776

777 Figure 2. Haplotype networks based on concatenated mtDNA sequences. Circles represent  
778 unique haplotypes with the size of the circle corresponding to the relative abundance and  
779 the color referring to the region of origin of individuals with that haplotype (see boxes in  
780 upper left representing geographic approximations of each region). Lines connecting  
781 haplotypes represent one mutational step. Small white circles represent unsampled  
782 haplotypes. [Alternate version for individuals with color vision deficiencies included].

783

784 Figure 3. Majority-rules consensus tree from Bayesian phylogenetic analysis of  
785 concatenated mtDNA sequence data. Posterior probability for all nodes is 1 unless  
786 otherwise indicated. Tips are labeled with a sample name followed by the number of  
787 samples with an identical haplotype. Regions of collection are indicated vertically with  
788 several exceptions listed parenthetically in terminal name.



789

790 Figure 4. Individual assignment plots from nested Bayesian assignment tests in  
791 STRUCTURE. Results at alternate values of K are shown for some subsets of individuals.

792

793 Figure 5. Estimates of divergence and expansion times as well as current and historical  
794 effective population sizes for the best supported model from ABC analysis of the complete  
795 genetic dataset.

**Figure 1**

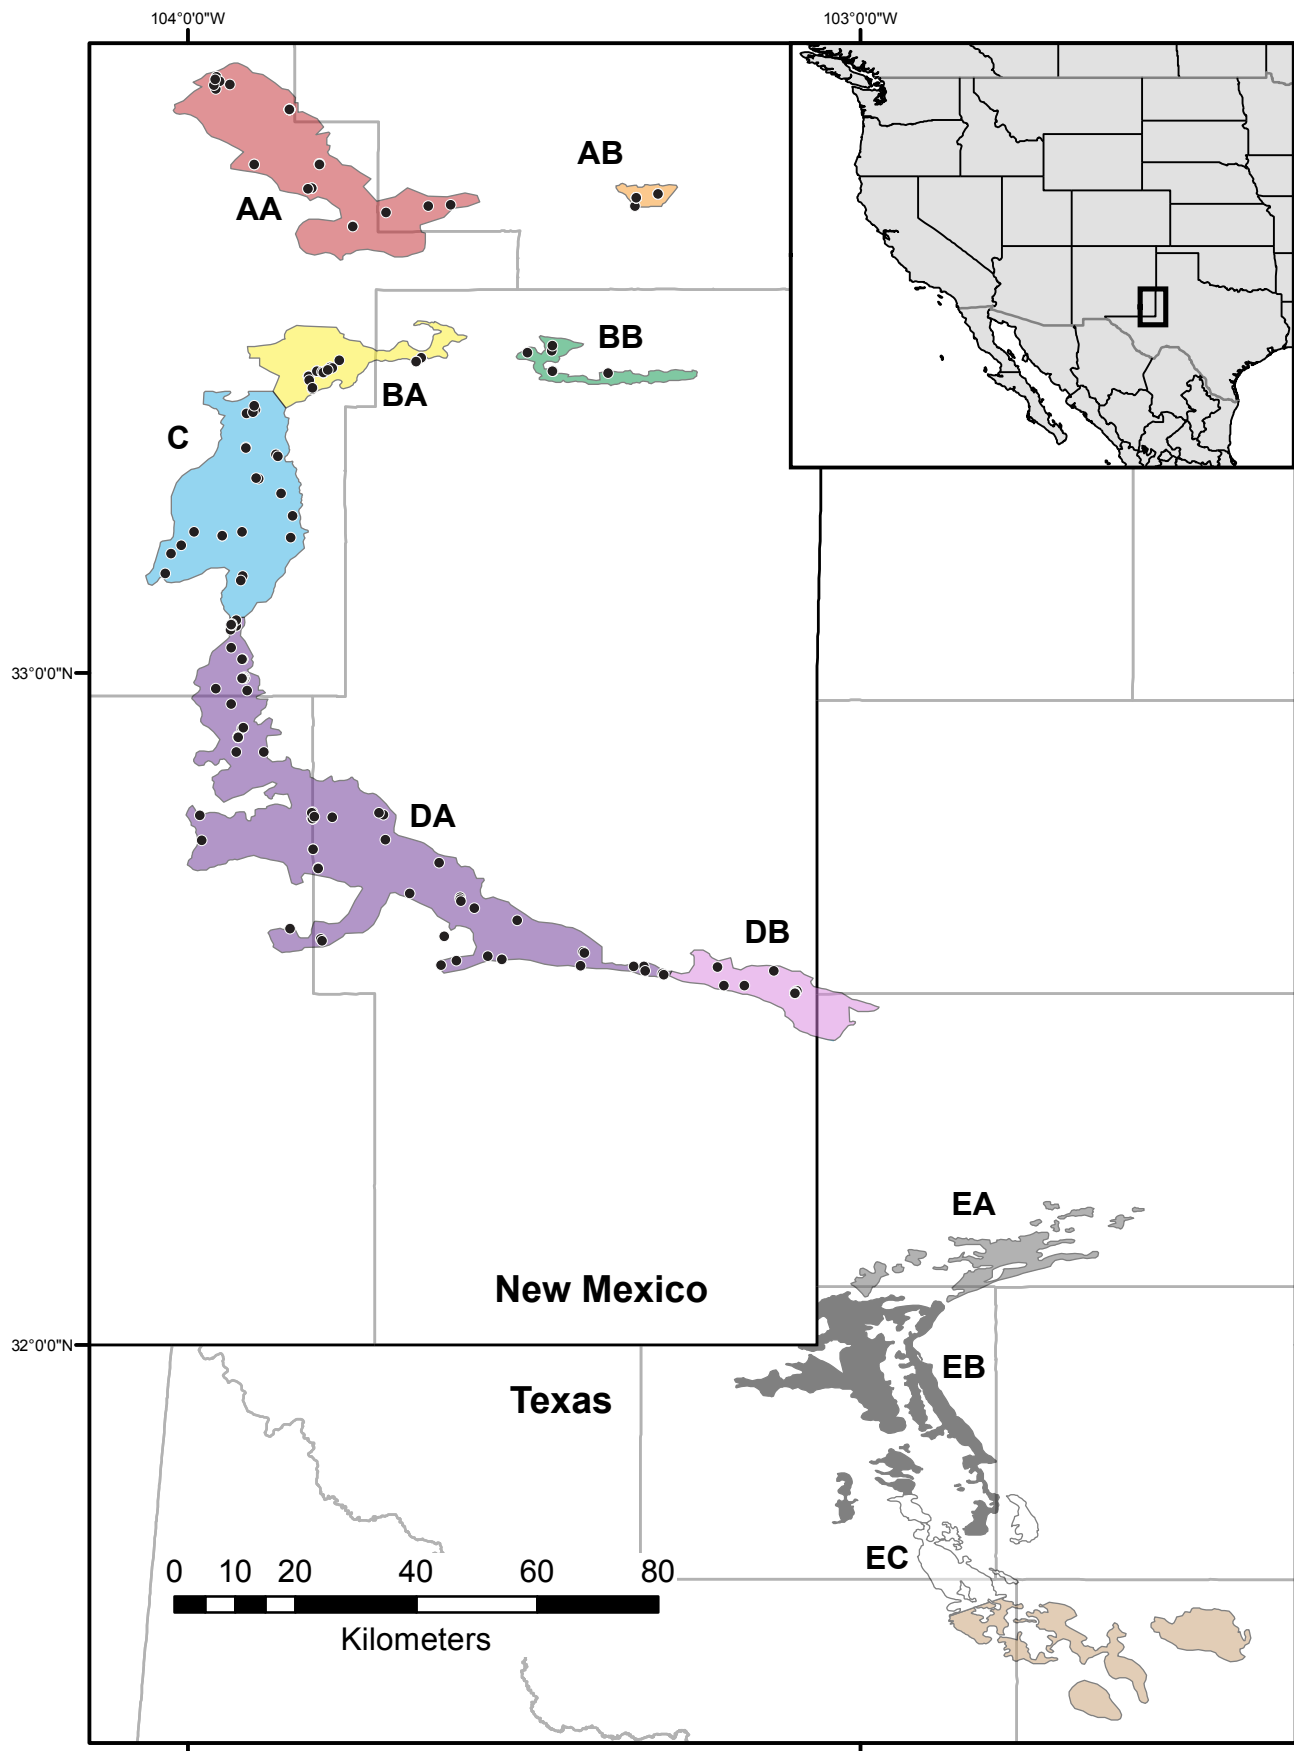

Figure 2

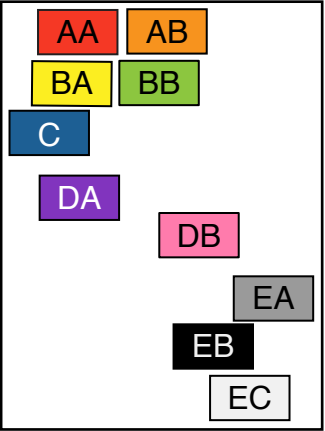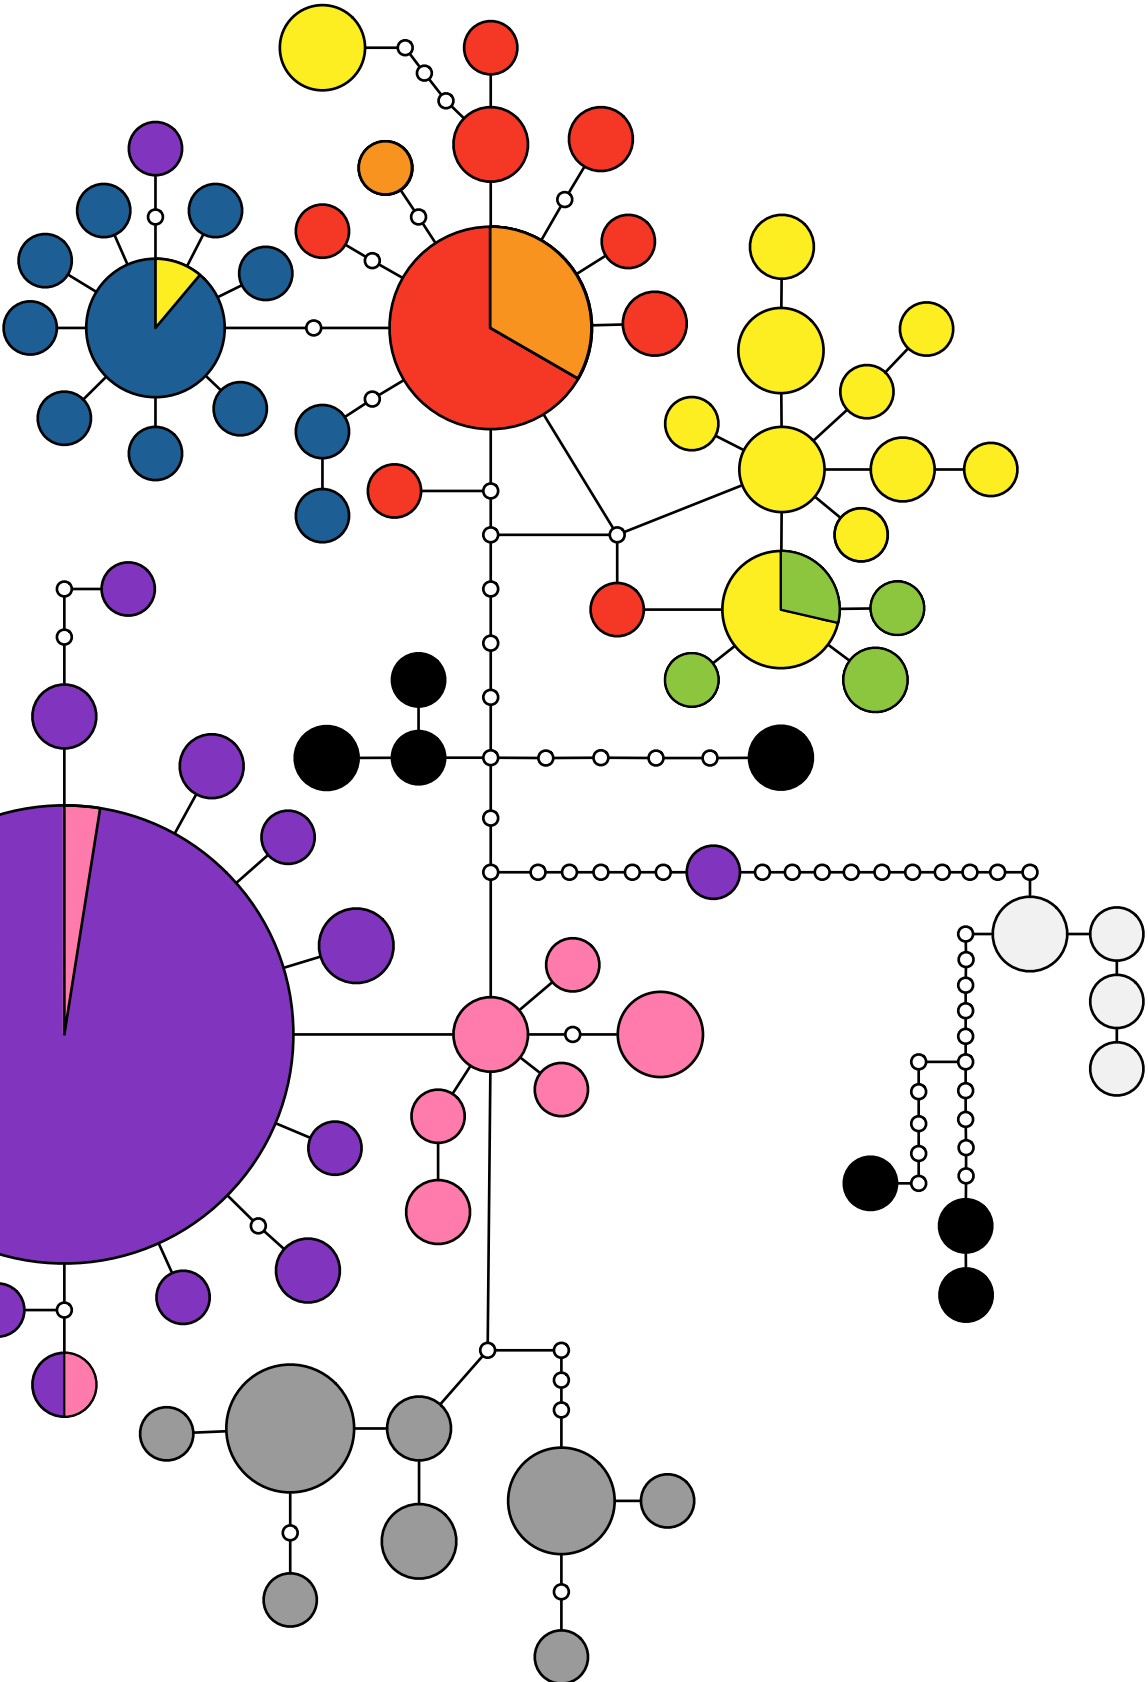

Figure 2 (alternate version)

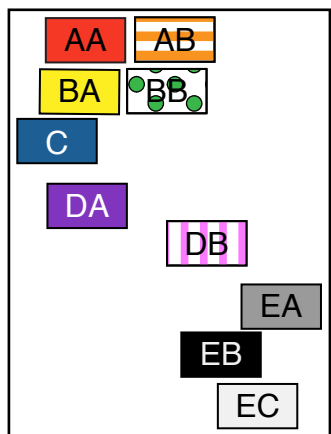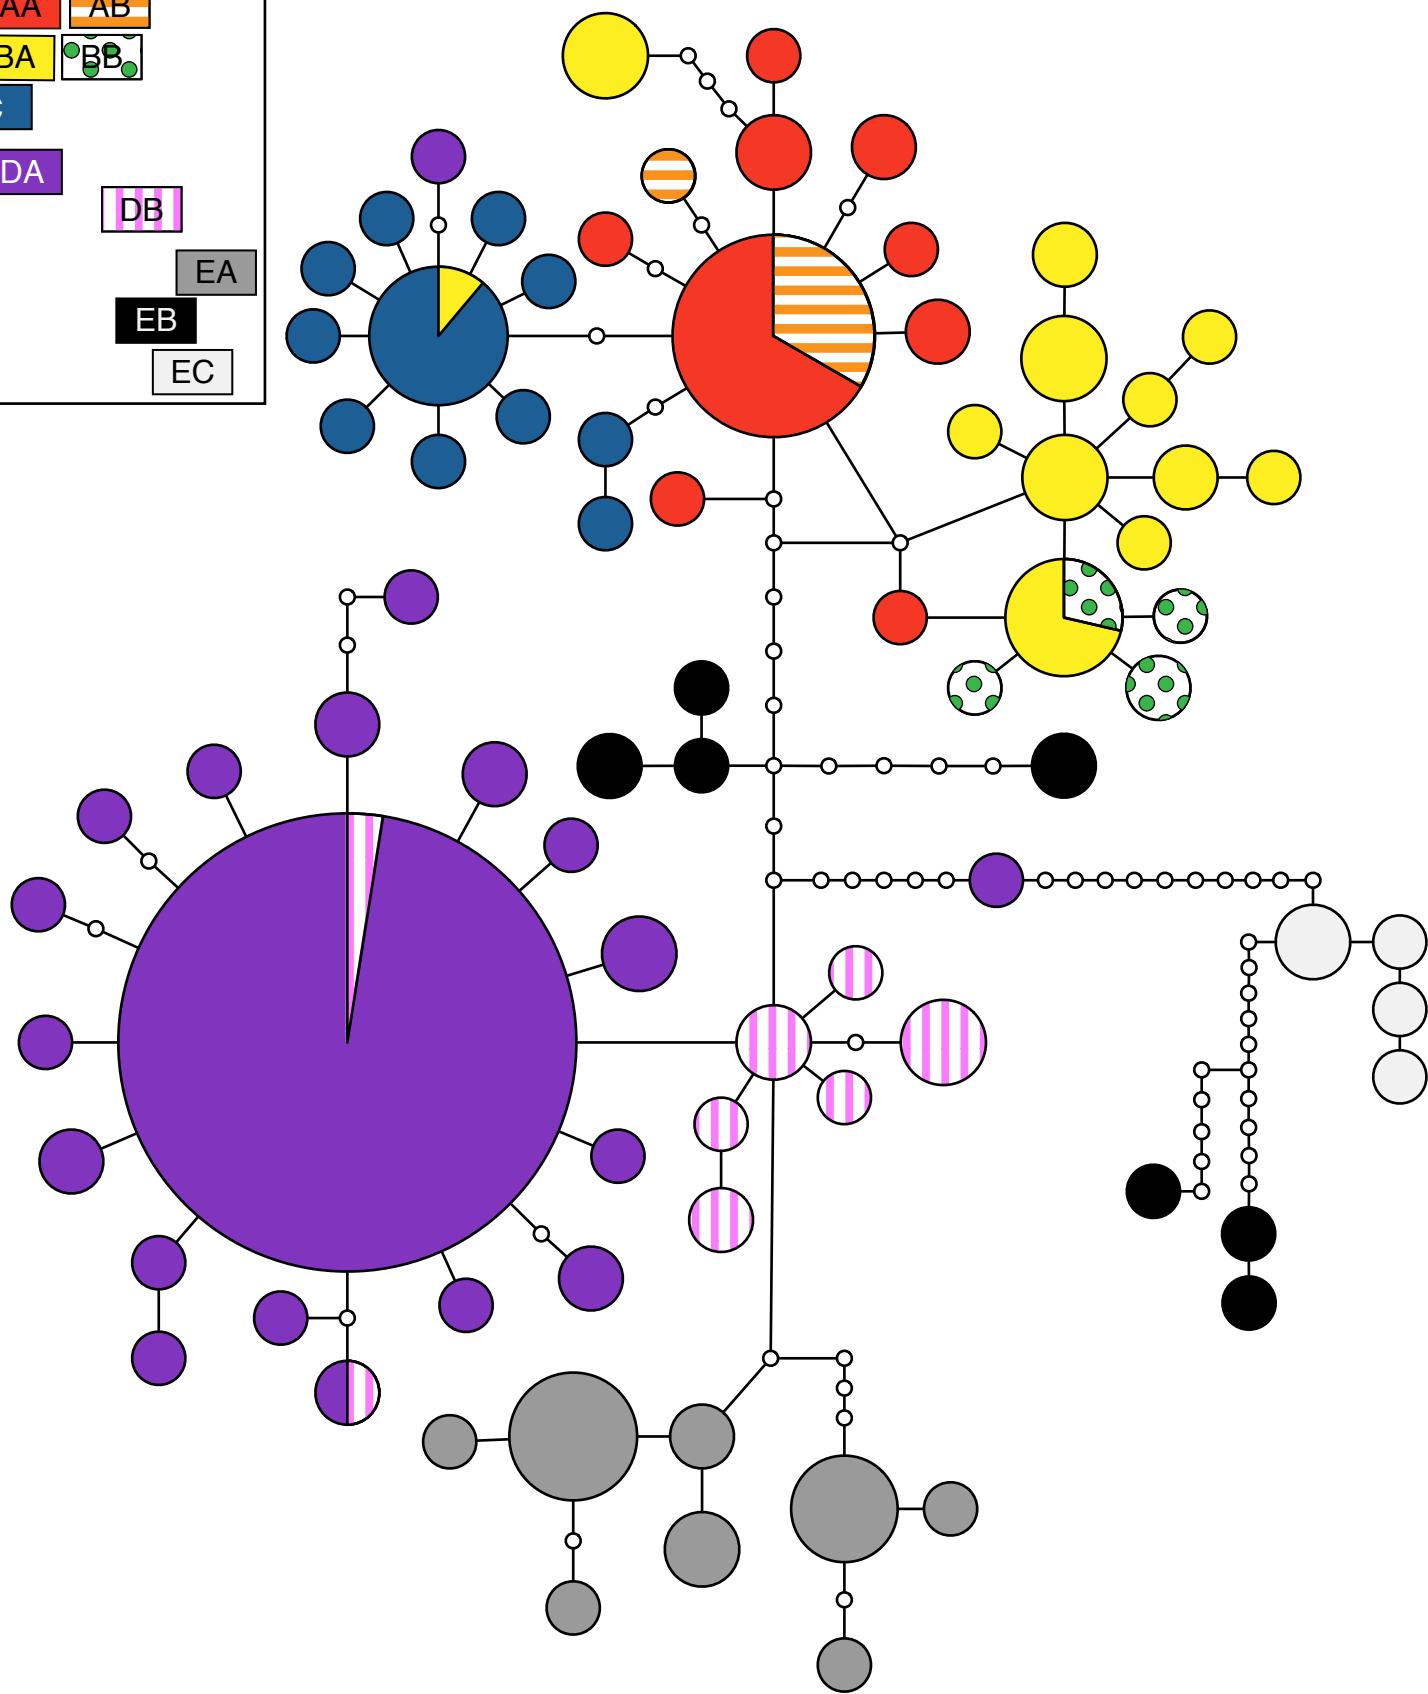

**Figure 3**

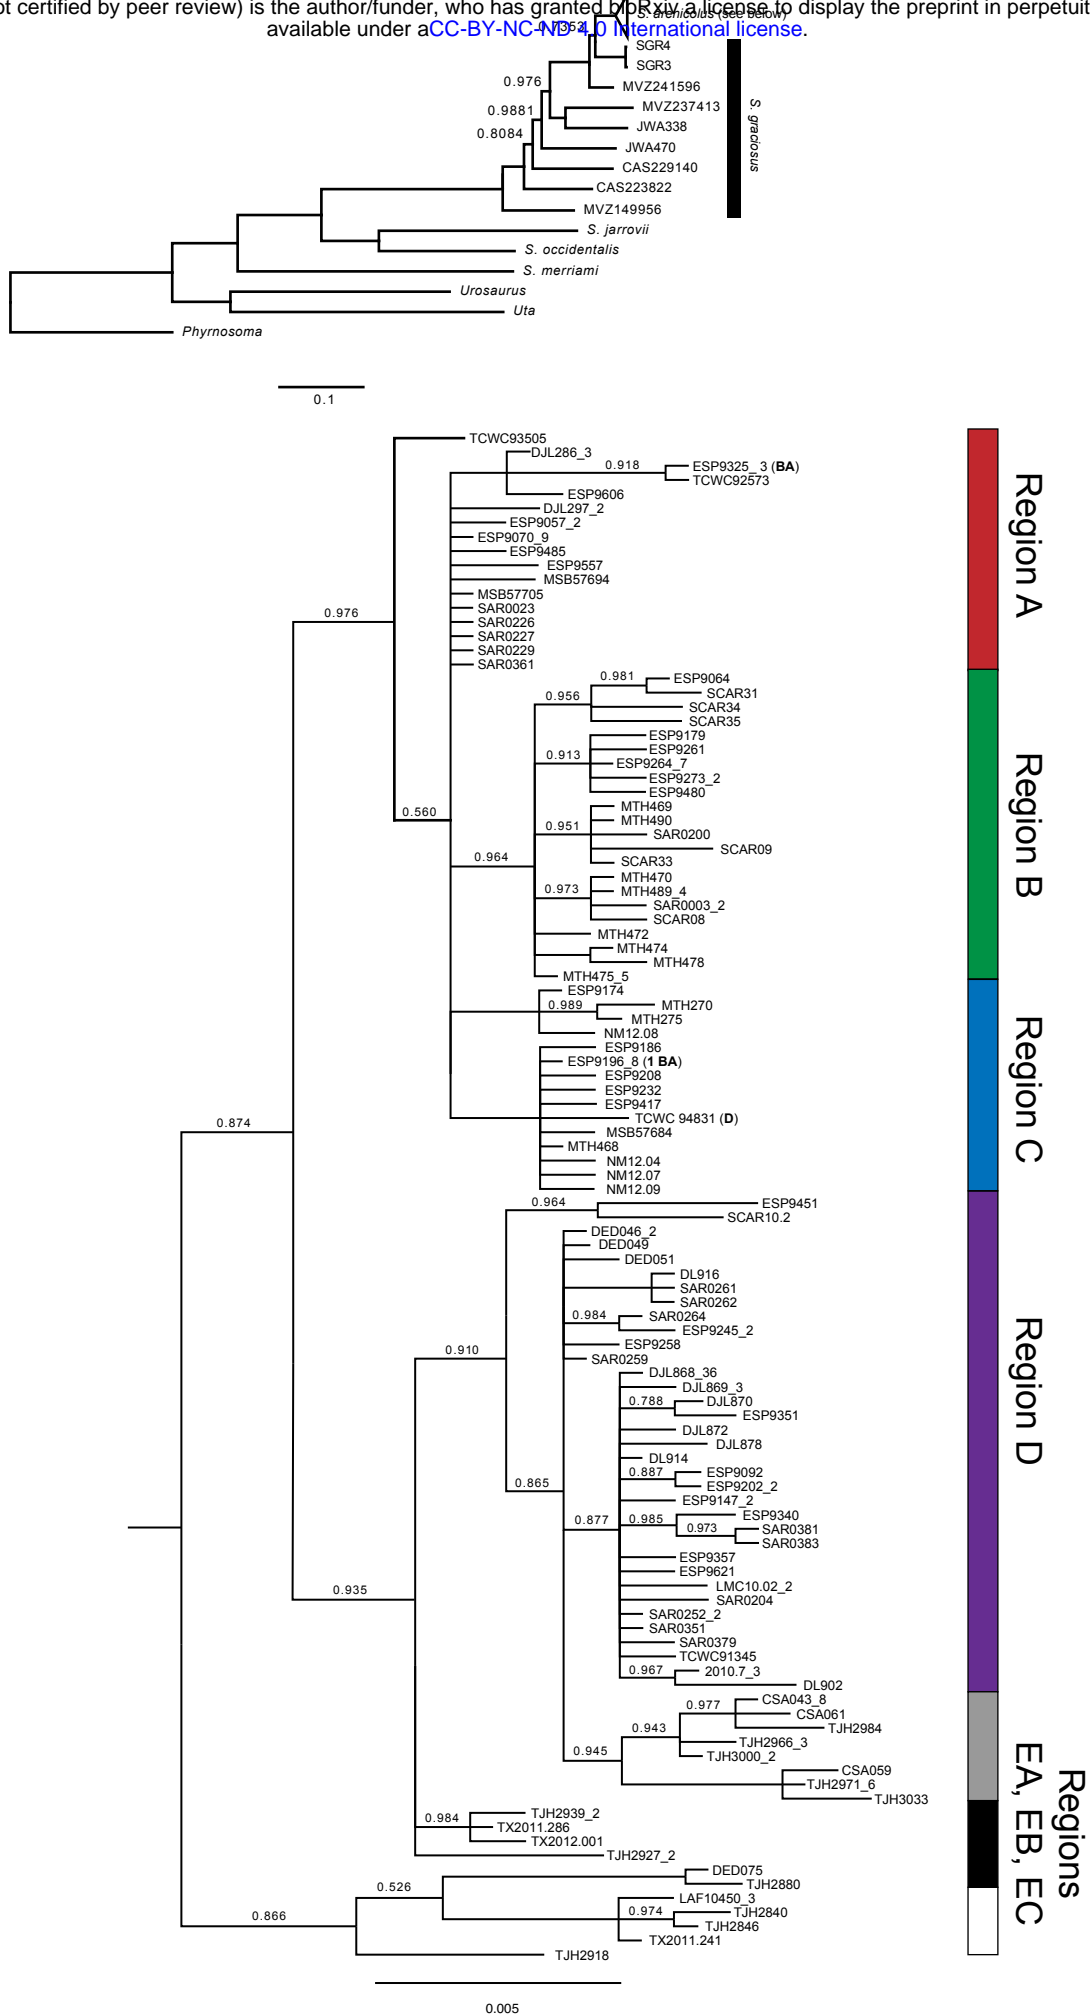

Figure 4

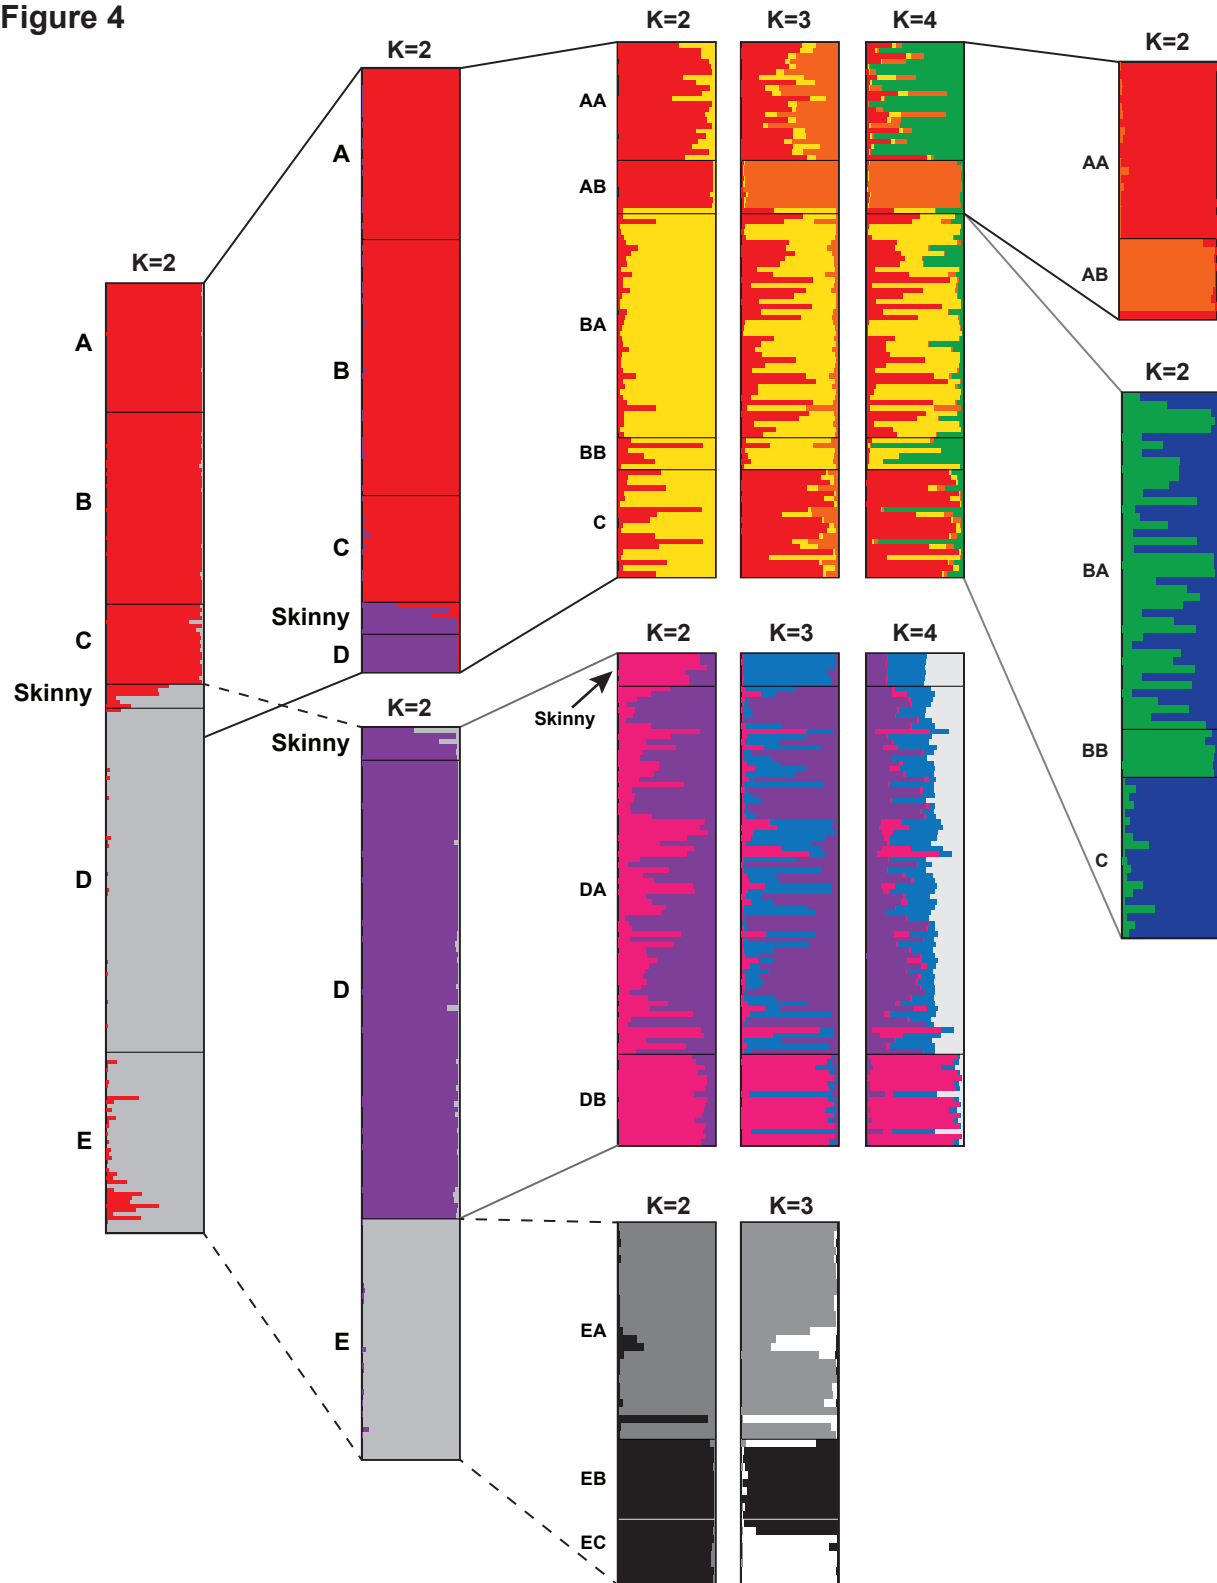

Figure 5

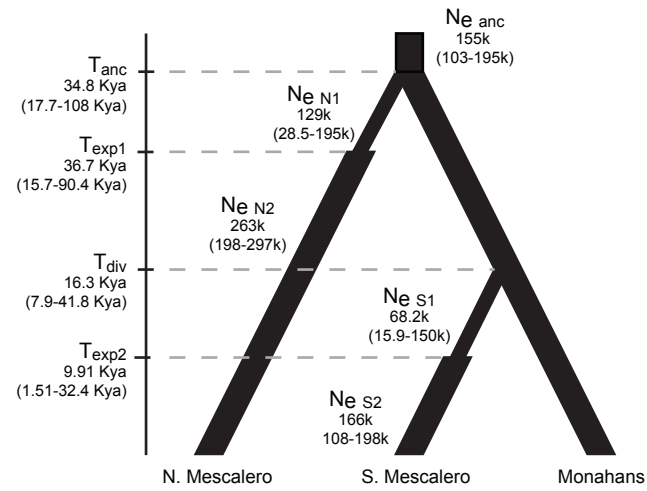

Source: https://www.biorxiv.org/content/10.1101/2020.06.23.168088v1.full.pdf
